# Supplementary material for: Self-Defensive Pod-like CoFe@Void@NC@CNFs Coatings for Naval Stealth and Corrosion-Microbial Resistance in Harsh Marine Environments
Source: Research Square preprint supplement (doi:10.21203/rs.3.rs-7134646/v1), 2025-09-23
Supplement: Supplementary file 1 [file 12cffd9701d3d12750fd6e5e.docx]

*Supporting Information*

**Self-Defensive Pod-like CoFe@Void@NC@CNFs Coatings for Naval Stealth and Corrosion-Microbial Resistance in Harsh Marine Environments**

Qiqin Liang1. Beibei Zhan1. Xiaosi Qi1,*. Jing-Liang Yang1. Junfei Ding1. Yunpeng Qu1. Wei Zhong2. Aming Xie3

[[1]](#footnote-1)

*1College of Physics, Guizhou Province Key Laboratory for Photoelectrics Technology and Application, Guizhou University, Guiyang City 550025, People’s Republic of China*

*2National Laboratory of Solid State Microstructures and Jiangsu Provincial Laboratory for NanoTechnology, Nanjing University, Nanjing 210093, People’s Republic of China*

*3School of Safety Science and Engineering, Nanjing University of Science and Technology, Nanjing 210094, People’s Republic of China*

**Materials characterization**

To investigate the phases, microstructures and chemical compositions, the as-prepared samples were characterized by X-ray diffraction (XRD) (λ = 0.15418 nm), scanning electron microscopy (SEM) (model Hitachi Regulus 8100) and transmission electron microscope (TEM, JEOLJEM2100), respectively. Raman spectroscopy (model DXR, Thermo Fisher Scientific) and X-ray photoelectron spectroscopy (XPS, Escalab Xi+). The water contact angles (WCA) were measured using 5 μL DI (pH=7), HCl (pH=1) and KOH (pH=14) droplet at RT, which were conducted on a contact angle meter, combined with a high-speed camera, respectively. The sample was mixed with paraffin into a battery containing 20 wt% sample, and the AC impedance was measured through a chemical workstation. For the measurement of their MAPs, the as-prepared samples (20 wt%) were firstly mixed with paraffin and subsequently pressed into a toroidal shape (inner diameter: 3.0 mm, outer diameter: 7.0 mm), and then their EM parameters were measured over a vector network analyzer (R&S ZNB-40) in the 2-18 GHz frequency range using the coaxial-line method. According to the transmission line theory, the values of reflection loss (RL) value and attenuation constant () could be obtained on basis of the measured EM parameters and the following equations [1, 2]:

(1)

(2)

(3)

where input impedance (), impedance of the free space (), complex permittivity (), complex permeability (),frequency (*f*), thickness (*d*) and velocity of light (*c*), respectively.

The radar cross-section (RCS) values of CoNi@NC-CoNi@CNTs MCNCs were simulated using CST Studio Suite 2020. The simulation employed a linear polarization wave as the excitation source and monitored the frequency at 14.4 GHz.

**Absorbance measurement**

The mixture comprised 20 wt% CoFe@Void@NC@CNFs and 80 wt% carboxymethyl cellulose (M.W. 250000) dispersed in DI water and ball milled for 24 h to form uniform slurry. The resulting slurry was coated on microscope slides (25×75 mm, 1 mm) and dried under vacuum at 60℃ for 12 hours. Then, the microscope slides were placed in UV-Vis Spectrophotometer (MAPADA-6100s) for testing.

**Anti-corrosion measurement**

The samples were immersed in 3.5 wt% NaCl solution and measured for their open circuit potential (OCP), AC impedance, and Tafel plots via a chemical workstation.

**
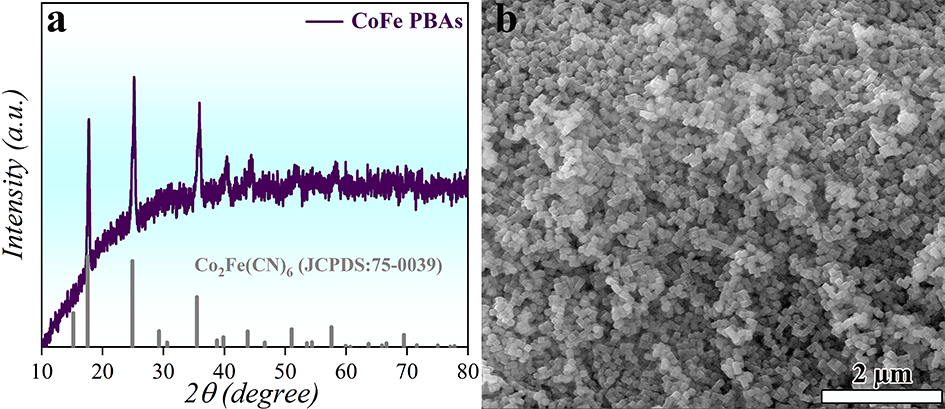
**

**Fig. S1** (**a**)XRD spectra and (**b**) SEM images of CoFe PBAs.


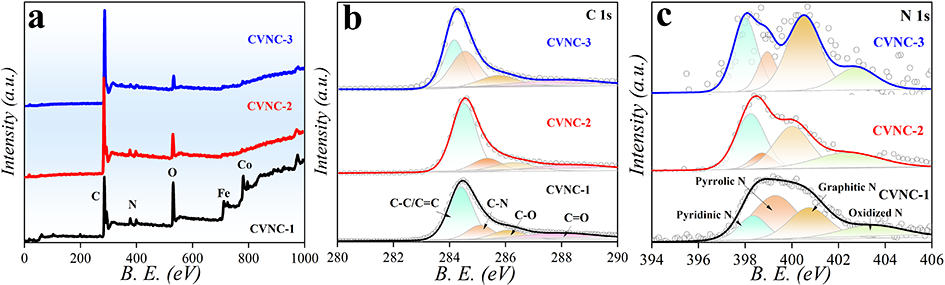


**Fig. S2** (**a**) XPS spectra, High-resolution XPS spectra of (**b**) C 1s and (**c**) N 1s for CVNC-1, CVNC-2 and CVNC-3.


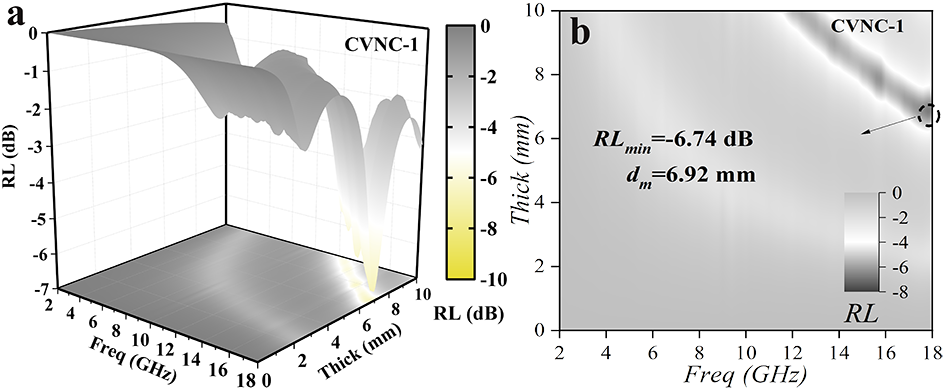


**Fig. S3** (**a**) Three-dimensional and (**b**) Two-dimensional RL curves for CVNC-1.


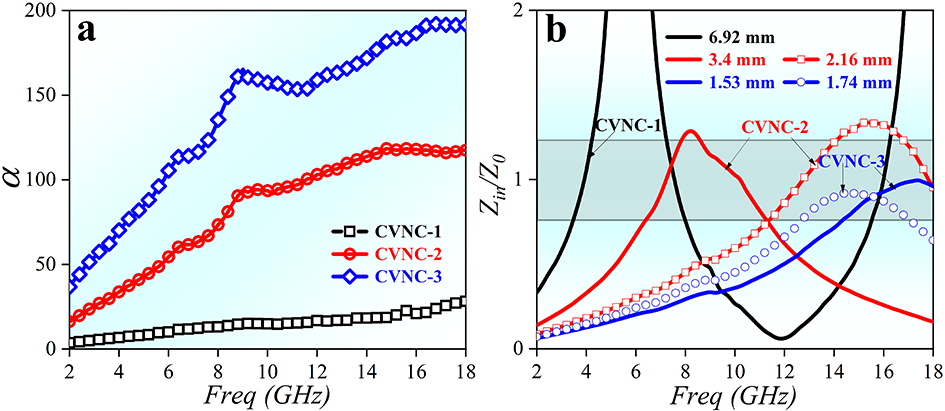


**Fig. S4** (**a**) and (**b**) curves for CVNC-1, CVNC-2 and CVNC-3.


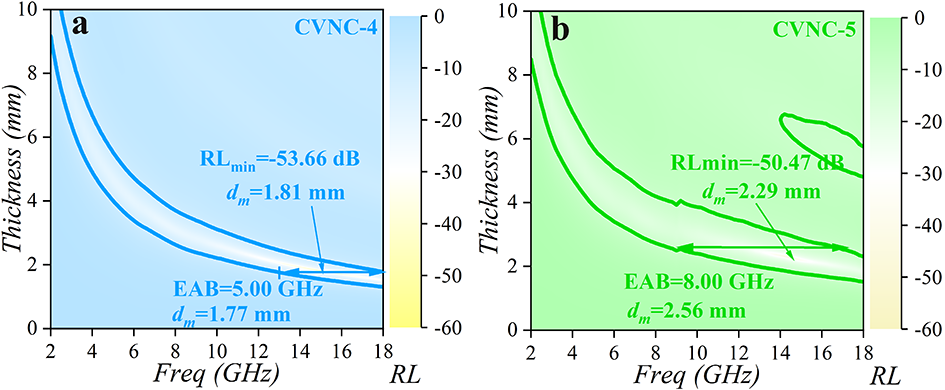


**Fig. S5** Two-dimensional RL color maps for CVNC-4 and CVNC-5.


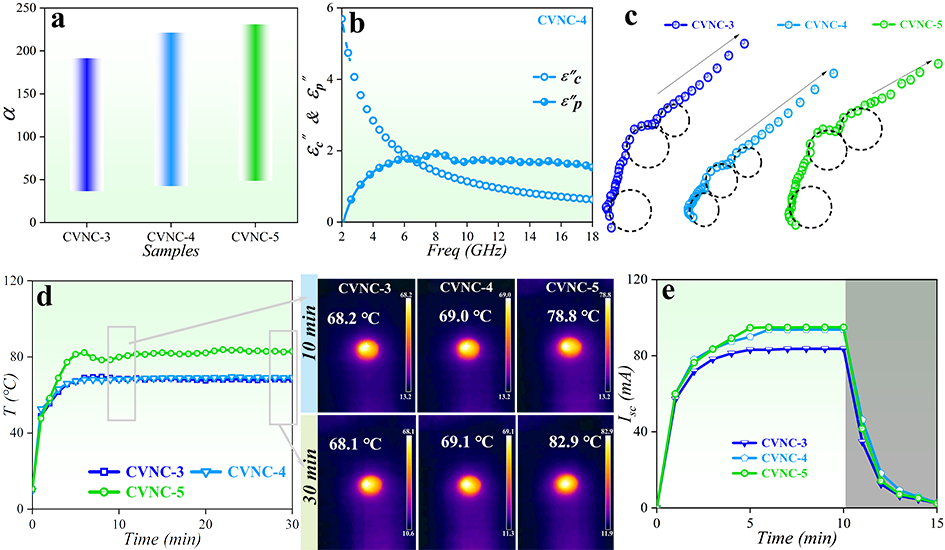


**Fig. S6** (**a**) , (**b**) & curves, (**c**) Cole-Cole curves, (**d**) *T-T* curves and infrared images and (**e**) *Isc* curves for CVNC-3, CVNC-4 and CVNC-5.


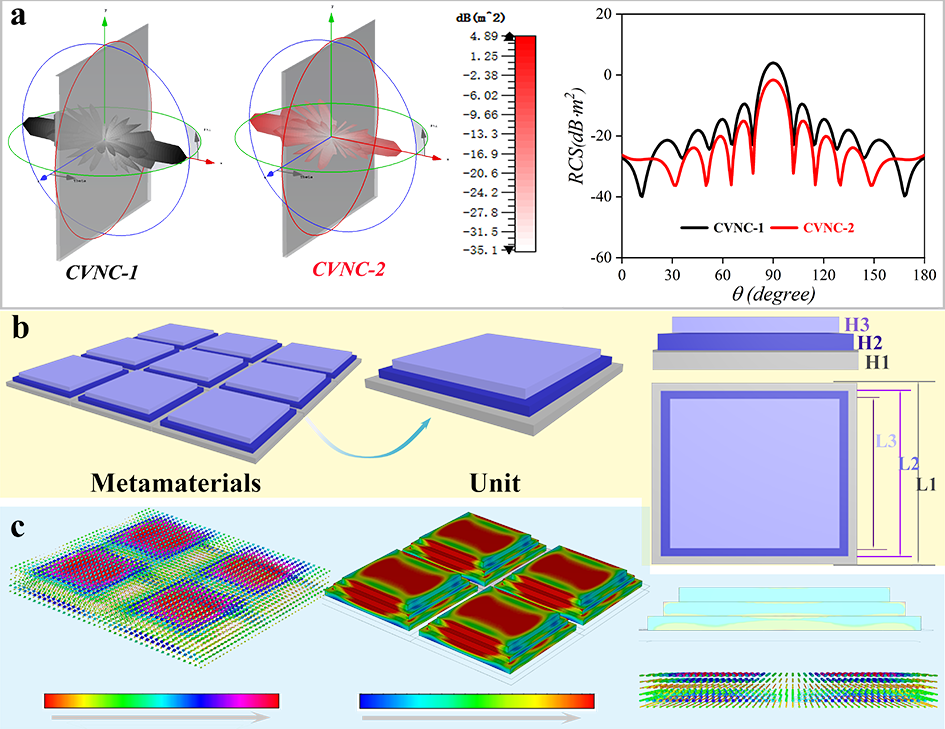


**Fig. S7** (**a**)Simulation results to CVNC-1 and CVNC-2, (**b**) schematic diagram of proposed metamaterial absorber and structural parameters, (**c**) distributions of electric field and power loss density of metamaterial absorber at 15.376 GHz.


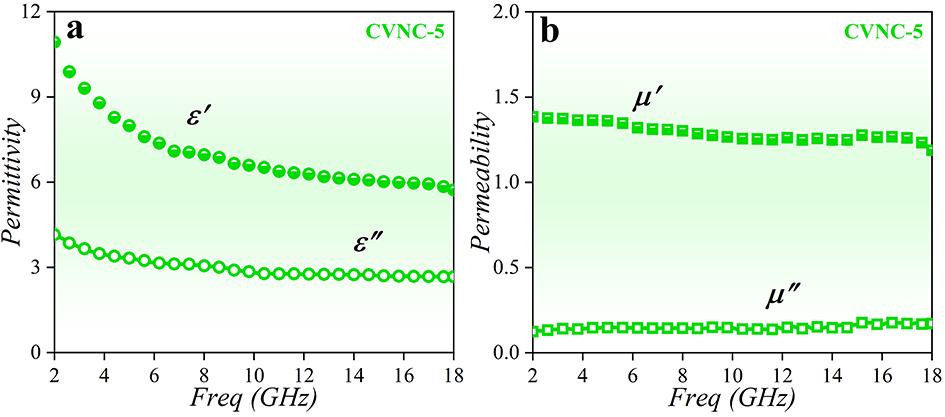


**Fig. S8** EM parameters of CVNC-5.


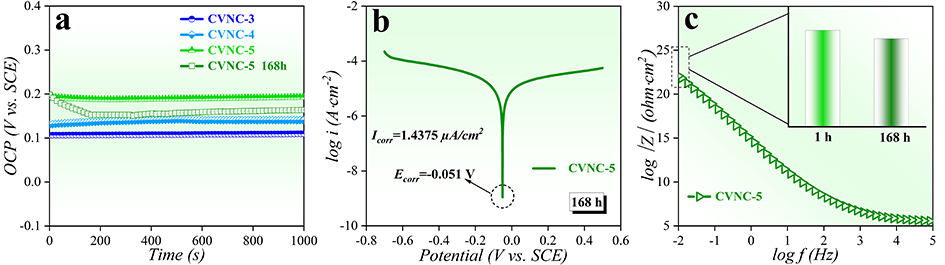


**Fig. S9** (**a**) OCP curves and (**b**) Tafel curves and (**c**) impedance modulus curves.

**
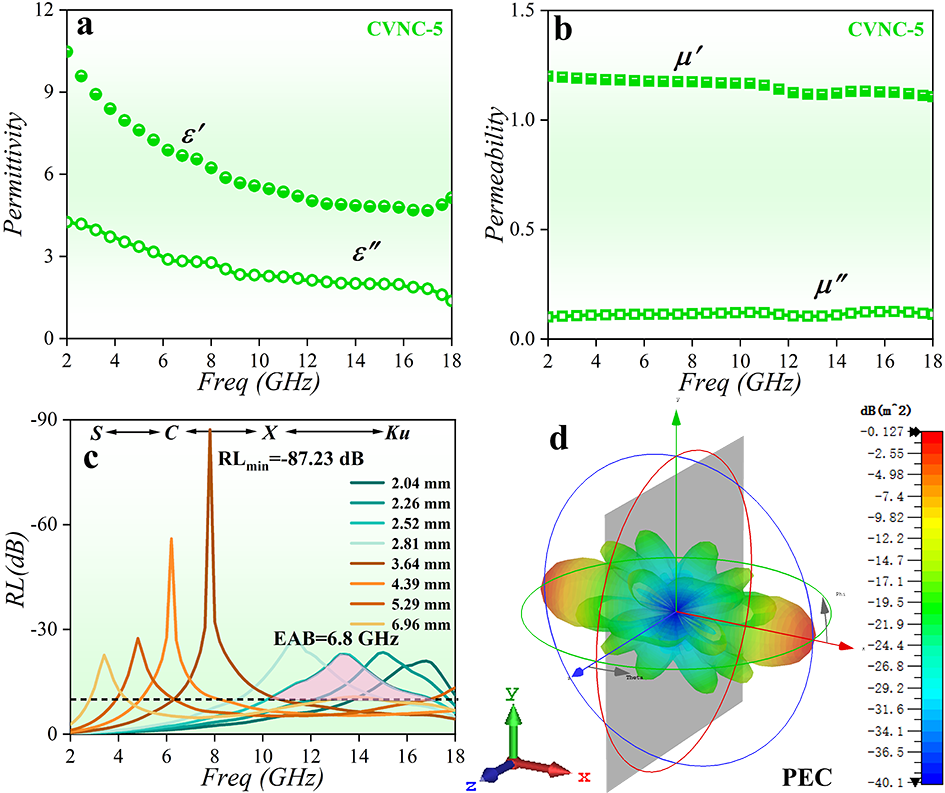
**

**Fig. S10** (**a**, **b**) EM parameters and (**c**) RL curves of CVNC-5, and (**d**) Three-dimensional radar wave scattering signals of PEC.

**References**

1. Chen Q, Wang Y, Xiong Y et al (2025) Fiber Materials for Applications of Electromagnetic Wave Absorption. Adv Fiber Mater. https://doi.org/10.1007/s42765-025-00522-z

2. Kim S, Lee S, Zhang Y et al (2023) Carbon-Based Radar Absorbing Materials toward Stealth Technologies. Adv Sci 10(32):2303104. <https://doi.org/10.1002/advs.202303104>.

1. *****Corresponding author. E-mail: xsqi@gzu.edu.cn [↑](#footnote-ref-1)
